# Supplementary material for: A regio- and stereo-selective synthesis of 2-hydroxy-3-methylochromycinone in three steps from 2-bromo-5-acetoxy-1,4-naphthoquinone and 1-acetoxy-3,3-dimethyl-5-vinylcyclohexa-1,5-diene†
Source: Royal Society of Chemistry journal article supplement (doi:10.1039/b101756j), 2001-01-01
Supplement: b101756j.doc [file b101756j.doc]

#### **Supplementary data**

#### **High Field NMR Data**

**Table S1** Summary of 1H n.m.r. data for bromo adduct **5.**

| **1H**  **ppm** | **Assign**  **ment** | **Area** | **Multiplicity**  **Coupling Constants** | **COSY** | **ROESY** |
| --- | --- | --- | --- | --- | --- |
| 8.00 | H11 | 1 | dd, 7.8, 1.2 Hz | H10, H9 | - |
| 7.75 | H10 | 1 | t, 7.8 Hz | H9, H11 | - |
| 7.37 | H9 | 1 | dd, 7.8, 1.2 Hz | H10, H11 | - |
| 5.54 | H5 | 1 | dt, 4.2, 2 Hz | H6eq, H6ax, H12b | CH3ax, H4eq, H4ax, |
| 5.40 | H2 | 1 | dd, 1.8, 1.5 Hz | H4eq, H12b | CH3ax, CH3eq, |
| 3.97 | H12bax | 1 | bs | H2, H5, H6ax | H4ax, H6a |
| 3.62 | H6aax | 1 | dd, 12.0, 6.0 Hz | H6ax, H6eq | H12b |
| 2.45 | H6eq | 1 | ddd,  12.8, 6.0, 4.2, Hz | H5, H6ax, H6a | - |
| 2.40 | C8acetate | 3 | s | - | - |
| 2.34 | H4ax | 1 | d, 12.9 Hz | H4eq | CH3eq, H5, H12b |
| 2.30 | H6ax | 1 | m, 12.8, 12.0, 4.2 Hz | H5, H6eq, H6a, H12b | - |
| 2.10 | C1acetate | 3 | s | - | - |
| 2.06 | H4eq | 1 | dd, 12.9, 1.8 Hz | H2, H4ax | CH3ax, CH3eq, H5, |
| 1.12 | CH3eq | 3 | s | - | H2, H4ax, H4eq, |
| 1.04 | CH3ax | 3 | s | - | H2, H4eq, H5 |

**Table S2** Summary of 13C n.m.r. data for bromo adduct **5.**

| **1H**  **ppm** | **Assign**  **ment** | **HSQC**  **13C ppm** | **Assign**  **ment** | **HMBC**  **13C** |
| --- | --- | --- | --- | --- |
| 8.00 | H11 | 126.02 | C11 | C7a, C8, C9, C10, C12, |
| 7.75 | H10 | 135.05 | C10 | C7a, C8, C9, C11, C11a |
| 7.37 | H9 | 129.97 | C9 | C7a, C8, C11, |
| 5.54 | H5 | 119.46 | C5 | C4, C6, C6a, C12b |
| 5.40 | H2 | 127.10 | C2 | CH3ax, CH3eq, C1, C3, C4, C12b |
| 3.97 | H12bax | 45.78 | C12b | C1, C4a, C12, C12a |
| 3.62 | H6aax | 59.37 | C6a | C5, C6, C7, C7a, C12, C12a, C12b |
| 2.45 | H6eq | 28.13 | C6 | C5, C6a, C12a, C4a |
| 2.40 | CH3, C8acetate | 20.98 | CH3, C8acetate | C8acetate (169.15) |
| 2.34 | H4ax | 46.74 | C4 | CH3ax, C3, C4a, C5, C12b |
| 2.30 | H6ax | 28.13 | C6 | C4a, C5, C6a, C7 |
| 2.10 | CH3, C1acetate | 21.90 | CH3, C1acetate | C1acetate (170.36), C2 |
| 2.06 | H4eq | 46.74 | C4 | CH3ax, CH3eq, C3, C4a, C5, C12a, C12b |
| 1.12 | CH3eq | 30.14 | CH3eq | CH3ax, C1, C2, C3, C4, C4a, |
| 1.04 | CH3ax | 26.94 | CH3ax | CH3eq, C1, C2, C3, C4, |

**Table S3** Summary of 1H n.m.r. data for *bis* -epoxide **6.**

| **1H**  **ppm** | **Assign**  **ment** | **Area** | **Multiplicity**  **Coupling Constants** | **COSY** | **ROESY** |
| --- | --- | --- | --- | --- | --- |
| 7.96 | H11 | 1 | dd, 7.5, 1.2 Hz | H10, H9 | - |
| 7.78 | H10 | 1 | t, 7.5 Hz | H9, H11 | - |
| 7.40 | H9 | 1 | dd., 5, 1.2 Hz | H10, H11 | - |
| 3.76 | H12bax | 1 | bs | H2 | H4ax, H6a |
| 3.73 | H6aax | 1 | dd, 12.6, 4.2 Hz | H6ax,H6eq | H12b |
| 3.35 | H2eq | 1 | bs | H12bax | CH3ax, CH3eq |
| 2.96 | H5eq | 1 | bs | H6eq, H6ax | CH3ax, H4eq |
| 2.43 | H6eq | 1 | ddd, 14.0, 4.2, 2.4 Hz | H5, H6ax, H6a | - |
| 2.40 | C8 acetate | 3 | s | - | - |
| 2.27 | H4ax | 1 | d, 13.8 Hz | H4eq | CH3eq, H12b |
| 1.96 | H6ax | 1 | ddd, 14.0, 12.6, 1.2 Hz | H5, H6eq, H6a | - |
| 1.95 | C1 acetate | 3 | s | - | CH3eq |
| 1.20 | CH3ax | 3 | s | - | H2, H4eq, H5eq |
| 1.15 | CH3eq | 3 | s | - | C1acetate, H2, H4ax, H4eq, |
| 0.71 | H4eq | 1 | d, 13.8 Hz | H4ax | CH3eq, CH3ax, H5eq |

**Table S4** Summary of 13C n.m.r. data for *bis* -epoxide **6.**

| **1H**  **ppm** | **Assign**  **ment** | **HSQC**  **13C ppm** | **Assign**  **ment** | **HMBC**  **13C** |
| --- | --- | --- | --- | --- |
| 7.96 | H11 | 125.70 | C11 | C7a, C9, C12, |
| 7.78 | H10 | 135.23 | C10 | C7a, C8, C11, C11a |
| 7.40 | H9 | 130.30 | C9 | C7a, C8, C11, |
| 3.76 | H12bax | 45.43 | C12b | C1, C2, C4a, C5, C6a, C12, C12a |
| 3.73 | H6aax | 54.88 | C6a | C6, C7, C7a, C12, C12a |
| 3.35 | H2 | 67.04 | C2 | CH3eq, C1, C3, C4, |
| 2.96 | H5eq | 60.68 | C5 | C6a, C6 |
| 2.43 | H6eq | 28.05 | C6 | C12a, C4a |
| 2.40 | CH3, C8acetate | 20.97 | CH3, C8acetate | C8acetate (169.13) |
| 2.27 | H4ax | 41.44 | C4 | CH3ax, CH3eq, C3, C4a, C5 |
| 1.96 | H6ax | 28.05 | C6 | C6a, C7 |
| 1.95 | CH3, C1acetate | 22.51 | CH3, C1acetate | C1, C1acetate (169.57) |
| 1.20 | CH3ax | 22.43 | CH3ax | CH3eq, C2, C3, C4 |
| 1.15 | CH3eq | 27.71 | CH3eq | CH3ax, C1, C2, C3, C4, C4a |
| 0.71 | H4eq | 41.44 | C4 | CH3ax, C2, C3, C4a, C5, C12b |

**Table S5** Summary of 1H n.m.r. data for diol **8.**

| **1H**  **ppm** | **Assign**  **ment** | **Area** | **Multiplicity**  **Coupling Constants** | **COSY** | **ROESY** |
| --- | --- | --- | --- | --- | --- |
| 7.93 | H11 | 1 | dd, 7.8, 1.2 Hz | H10, H9 | - |
| 7.77 | H10 | 1 | t, 7.8 Hz | H9, H11 | - |
| 7.37 | H9 | 1 | dd, 7.8, 1.2 Hz | H10, H11 | - |
| 5.58 | C5-OH | 1 | d, 6.0 Hz | H5ax | H4eq, H6eq, H6ax |
| 4.44 | H5ax | 1 | ddd, 15.6, 6.6, 6.0 Hz | H6ax, H6eq  C5-OH | H4ax |
| 4.30 | H2ax | 1 | d, 4.2 Hz | C2-OH | CH3eq, H4ax |
| 4.15 | C2-OH | 1 | bd, 4.2 Hz | H2ax | CH3ax, H4eq |
| 3.22 | H6eq | 1 | dd, 16.8, 6.6 Hz | H5ax, H6ax | C5-OH |
| 3.07 | H4eq | 1 | d, 20.0 Hz | H4ax | CH3ax, CH3eq, C5-OH, C2-OH |
| 2.47 | H4ax | 1 | d, 20.0 Hz | H4eq | H2ax, H5ax |
| 2.43 | CH3 acet. | 3 | s | - | - |
| 2.34 | H6ax | 1 | dd, 16.8, 15.6 Hz | H6eq, H5ax | CH3ax, C5-OH |
| 1.26 | CH3eq | 3 | s | - | CH3ax, H2ax, H4eq, H4ax |
| 0.84 | CH3ax | 3 | s | - | CH3eq, C2-OH, H4eq, H6ax |

**Table S6** Summary of 13C n.m.r. data for diol **8.**

| **1H**  **ppm** | **Assign**  **ment** | **HSQC**  **13C ppm** | **Assign**  **ment** | **HMBC**  **13C** |
| --- | --- | --- | --- | --- |
| 7.93 | H11 | 123.74 | C11 | C7a, C9, C12, |
| 7.77 | H10 | 133.76 | C10 | C8, C11a |
| 7.37 | H9 | 128.24 | C9 | C7a, C8, C11, |
| 5.58 | C5-OH | - | C5-OH | C5, C5a, C6 |
| 4.44 | H5ax | 66.62 | C5 | C2, C4a, C6, C6a, C12b |
| 4.30 | H2ax | 78.91 | C2 | CH3ax, CH3eq, C1, C3 |
| 4.15 | C2-OH | - | C2-OH | C1, C2, C3 |
| 3.22 | H6eq | 27.76 | C6 | C5, C5a, C6a, C7, C12a |
| 3.07 | H4eq | 37.85 | C4 | CH3ax, C2, C3, C4a, C5, C12b |
| 2.47 | H4ax | 37.85 | C4 | CH3ax, CH3eq, C3, C4a, C12b |
| 2.43 | CH3, C8acetate | 20.15 | CH3, C8acetate | C8acetate (168.21) |
| 2.34 | H6ax | 27.76 | C6 | C4a, C5, C6a, C12a, C12b |
| 1.26 | CH3eq | 26.85 | CH3eq | CH3ax, C2, C3, C4, C4a |
| 0.84 | CH3ax | 18.24 | CH3ax | CH3eq, C2, C3, C4 |

**Table S7** Summary of 1H n.m.r. data for **9.**

| **1H**  **ppm** | **Assign**  **ment** | **Area** | **Multiplicity**  **Coupling Constants** | **COSY** | **ROESY** |
| --- | --- | --- | --- | --- | --- |
| 7.91 | H11 | 1 | dd, 7.8, 1.2 Hz | H10, H9 | - |
| 7.65 | H10 | 1 | t, 7.8 Hz | H9, H11 | - |
| 7.27 | H9 | 1 | dd, 7.8, 1.2 Hz | H10, H11 | - |
| 5.42 | H2ax | 1 | s | - | CH3eq, H4ax |
| 4.59 | H5ax | 1 | ddd, 11.4, 7.0, 5.4, Hz | H6ax, H6eq, C5-OH | H4ax |
| 3.23 | H6eq | 1 | d, 16.8, 7.0 Hz | H5ax, H6ax | - |
| 3.07 | H4eq | 1 | d, 20.2 Hz | H4ax | CH3ax, CH3eq, C5-OH |
| 2.81 | C5-OH | 1 | d, 5.4 Hz | H5ax | H4eq, H6ax |
| 2.58 | H4ax | 1 | bd, 20.2 Hz | H4eq, CH3ax | CH3eq, H2ax, H5ax |
| 2.43 | C8acetate | 3 | s | - | - |
| 2.40 | H6ax | 1 | dd, 16.8, 11.4 Hz | H6eq, H5ax | C5-OH, CH3ax |
| 2.24 | C2acetate | 3 | s | - | CH3ax, CH3eq |
| 1.21 | CH3eq | 3 | s | - | CH3ax, C1acetate, H2ax, H4ax, H4eq |
| 1.01 | CH3ax | 3 | bs | H4ax | CH3eq, C1acetate, H4eq |

**Table S8** Summary of 13C n.m.r. data for **9.**

| **1H**  **ppm** | **Assign**  **ment** | **HSQC**  **13C ppm** | **Assign**  **ment** | **HMBC**  **13C** |
| --- | --- | --- | --- | --- |
| 7.91 | H11 | 125.28 | C11 | C7, C7a, C8, C9, C11a, C12, |
| 7.65 | H10 | 134.80 | C10 | C7a, C8, C9, C10, C11 |
| 7.27 | H9 | 129.02 | C9 | C7, C7a, C8, C11, |
| 5.42 | H2ax | 80.96 | C2 | CH3eq, C1, C2acetate, C2acetate (170.52), C3, C4, C12b |
| 4.59 | H5ax | 68.17 | C5 | C4a, C6, C6a, C12b |
| 3.23 | H6eq | 28.76 | C6 | C4a, C5, C6a, C7, C12b |
| 3.07 | H4eq | 39.42 | C4 | CH3ax, C1, C2, C3, C4a, C5, C12b |
| 2.81 | C5-OH | - | C5-OH | C4a, C5, C6 |
| 2.58 | H4ax | 39.42 | C4 | CH3eq, CH3ax, C1, C3, C4a, C5, C12b |
| 2.43 | CH3, C8acetate | 21.09 | CH3, C8acetate | C8acetate (169.54) |
| 2.40 | H6ax | 28.76 | H6ax | C4a, C5, C6a, C7, C12, C12a, C12b |
| 2.24 | CH3, C2acetate | 20.74 | CH3, C2acetate | C2acetate (170.52) |
| 1.21 | CH3eq | 27.48 | CH3eq | CH3ax, C1, C2, C3, C4, C5 |
| 1.01 | CH3ax | 20.70 | CH3ax | CH3eq, C2, C2acetate, C3 |
